# Supplementary material for: Mechanisms of reversible hydrogen storage in NaBH4 through NdF3 addition
Source: Royal Society of Chemistry journal article supplement (doi:10.1039/c3ta01105d), 2013-01-01
Supplement: c3ta01105d.pdf [file c3ta01105d.pdf]

# Mechanisms of Reversible Hydrogen Storage in NaBH<sub>4</sub> Through NdF<sub>3</sub> Addition

## Electronic and XRD supplementary information

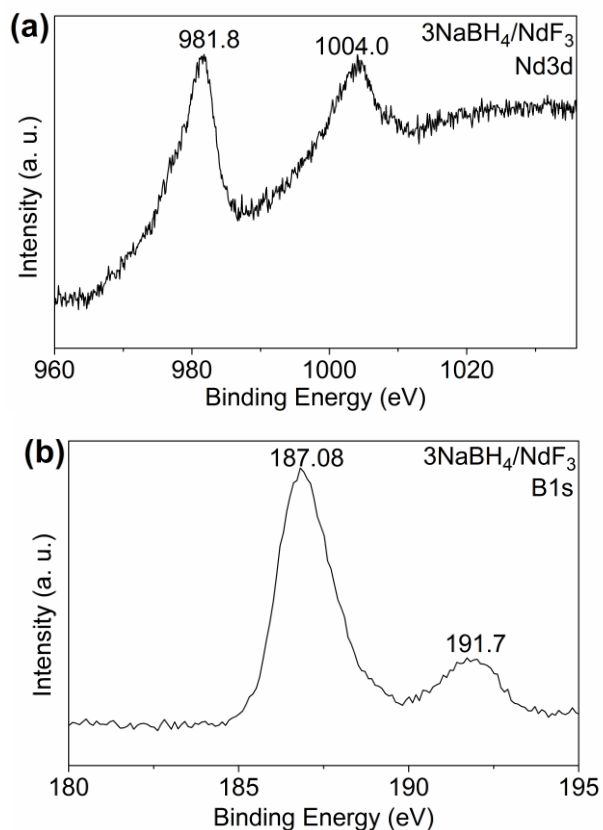

Fig. 1 Nd3d (a) and B1s (b) XPS spectra of the dehydrogenated 3NaBH<sub>4</sub>/NdF<sub>3</sub> composite

XPS is used for further identification of the existence and states of the elements B and Nd in the dehydrogenation sample of the 3NaBH<sub>4</sub>/NdF<sub>3</sub> composite. B1s and Nd3d photoemission peaks in the dehydrogenated sample of the 3NaBH<sub>4</sub>/NdF<sub>3</sub> composite are shown in Fig. 1. The peaks in Fig. 1(a) reveal that the Nd3d spectrum can be resolved into two sets of 3d<sub>3/2</sub> - 3d<sub>5/2</sub> spin-orbit doublets at 981.8 and 1004.0 eV, respectively. The B1s peak shows two different chemical states as shown in Fig. 1(b). According to the literature,<sup>1</sup> the banding energies at 181.1 and 191.7 eV are quite similar to the banding energies of NdB<sub>6</sub> and B<sub>x</sub>O<sub>y</sub> (1.5 < x/y < 3), respectively. The presence of B<sub>x</sub>O<sub>y</sub> may be due to the partial oxidation during the sample being taken out from the glove box and transferred to the XPS facility as well as the sputtering of oxygen during the XPS examination. The XPS results further demonstrate the formation of NdB<sub>6</sub> in the

dehydrogenation process of the 3NaBH<sub>4</sub>/NdF<sub>3</sub> composite. Similar result has been reported<sup>2</sup> in the study of LiBH<sub>4</sub>-CeH<sub>2</sub> system for which CeB<sub>6</sub> was formed during dehydrogenation. MB<sub>6</sub> type metal borides, such as CaB<sub>6</sub>, have the CsCl-like cubic structure in which B<sub>6</sub> octahedral clusters occupy the place of the Cl<sup>-</sup> ions.<sup>3</sup> The structure of CaB<sub>6</sub> is close to the polyhedral structure of [B<sub>12</sub>H<sub>12</sub>]<sup>2-</sup> ligand, so as NdB<sub>6</sub>.<sup>4</sup> In addition, the bonding energy of B-M is lower than that of B-B.<sup>5</sup> Therefore, from both geometric and energy point of views, the appearance of NdB<sub>6</sub> makes the formation of Na<sub>2</sub>[B<sub>12</sub>H<sub>12</sub>] or NaBH<sub>4</sub> from the dehydrogenated products of 3NaBH<sub>4</sub>/NdF<sub>3</sub> composite easier than that from the dehydrogenated products of pure NaBH<sub>4</sub>.

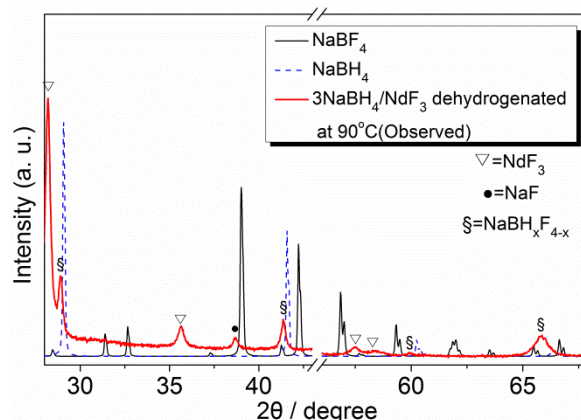

Fig. 2 Observed XRD pattern of a 3NaBH<sub>4</sub>/NdF<sub>3</sub> sample dehydrogenated at 90 °C in vacuum for 3.5h. Simulated patterns for NaBH<sub>4</sub> and NaBF<sub>4</sub> are also given for comparison.

In order to prove that the dehydrogenating reaction between NaBH<sub>4</sub> and NdF<sub>3</sub> can occur at low temperatures in vacuum, XRD analysis was carried out on a 3NaBH<sub>4</sub>/NdF<sub>3</sub> sample dehydrogenated at 90 °C in vacuum for 3.5 h. For comparison, the observed XRD pattern and simulated patterns for NaBH<sub>4</sub> (*F*-43*m*) and NaBF<sub>4</sub> (*Bbmm*) were all shown in Fig. 2. The peak located at 38.4° corresponds to the NaF (200) plane, indicating that the reaction between NaBH<sub>4</sub> and NdF<sub>3</sub> has already occurred at 90 °C in vacuum. As shown in Fig. 2, the observed diffraction peaks at 28.9°, 41.5°, 59.8° and 65.9° do have intensity between the simulated peaks of NaBH<sub>4</sub> and NaBF<sub>4</sub>. This further confirmed the formation of the intermediate NaBH<sub>x</sub>F<sub>4-x</sub> between NaBH<sub>4</sub> and NaBF<sub>4</sub> during the dehydrogenation process of the 3NaBH<sub>4</sub>/NdF<sub>3</sub> composite at low temperatures, which results from the interchange between F<sup>-</sup> and H<sup>-</sup>. Similar phenomenon was also observed in a 3NaF/Al system, for which the exchange of F<sup>-</sup> and H<sup>-</sup> resulted in the formation of intermediate phase Na<sub>3</sub>AlH<sub>6-x</sub>F<sub>x</sub>.<sup>6</sup>

## References

- S. Patil, G. Adhikary, G. Balakrishnan and K. Maiti, *Solid state communications*, 2011, **151**, 326-328.
- P. Mauron, M. Biemann, A. Remhof, A. Zuttel, J. H. Shim and Y. W. Cho, *J. Phys. Chem. C*, 2010, **114**, 16801-16805.
- F. A. Cotton, G. Wilkinson, Eds. *Advanced Inorganic Chemistry*, 5th ed.; John Wiley & Sons: New York, 1988, P167.
- J. F. Moulder, W. F. Stickle, P. E. Sobol and K. D. Bomben, in

*Handbook of X-ray Photoelectron Spectroscopy*, Perkin-Elmer Corp.,  
Eden Prairie, MN, 1992.

5. S. A. Jin, J. H. Shim, Y. W. Cho, K. W. Yi, O. Zabara and M. Fichtner,  
*Scr. Mater.*, 2008, **58**, 963-965.
6. H. W. Brinks, A. Fossdal and B. C. Hauback, *J. Phys. Chem. C*, 2008,  
**112**, 5658-5661.
